# Supplementary material for: Design and Synthesis of NTU-9/C3N4 Photocatalysts: Effects of NTU-9 Content and Composite Preparation Method
Source: MDPI journal article supplement (doi:10.3390/ma16145007), 2023-07-14
Supplement: s1 [file s1]

# Supplementary Materials

## Design and synthesis of NTU-9/C<sub>3</sub>N<sub>4</sub> photocatalysts: effects of NTU-9 content and composite preparation method

Damian Makowski<sup>1</sup>, Wojciech Lisowski<sup>2</sup>, Mateusz Baluk<sup>1</sup>, Tomasz Klimczuk<sup>3</sup>, Beata Bajorowicz<sup>1</sup>

<sup>1</sup> Department of Environmental Technology, Faculty of Chemistry, University of Gdansk, 80-308, Gdansk, Poland

<sup>2</sup> Institute of Physical Chemistry, Polish Academy of Sciences, 01-224 Warsaw, Poland

<sup>3</sup> Department of Solid State Physics, Faculty of Applied Physics and Mathematics, Gdansk University of Technology, 80-233 Gdansk, Poland

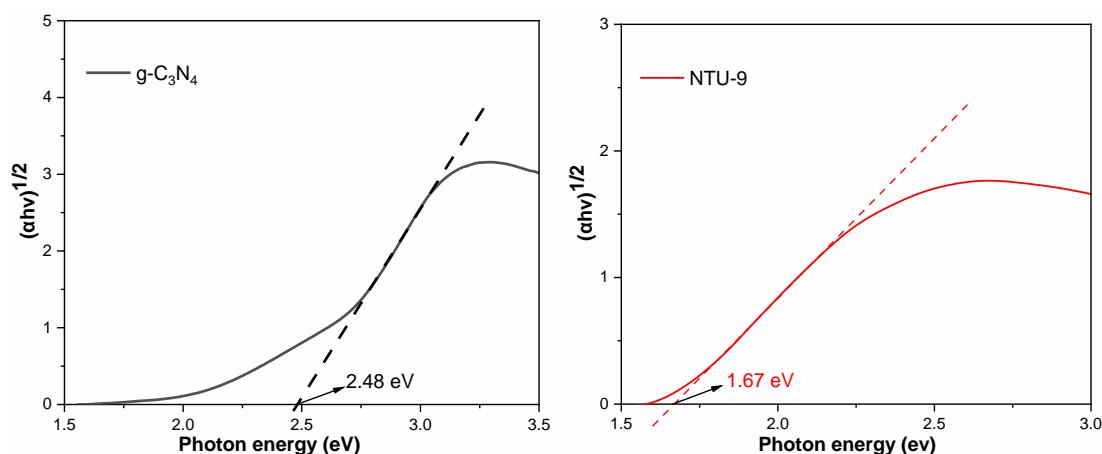

**Figure S1.** Tauc plots of (a) g-C<sub>3</sub>N<sub>4</sub> and (b) NTU-9.

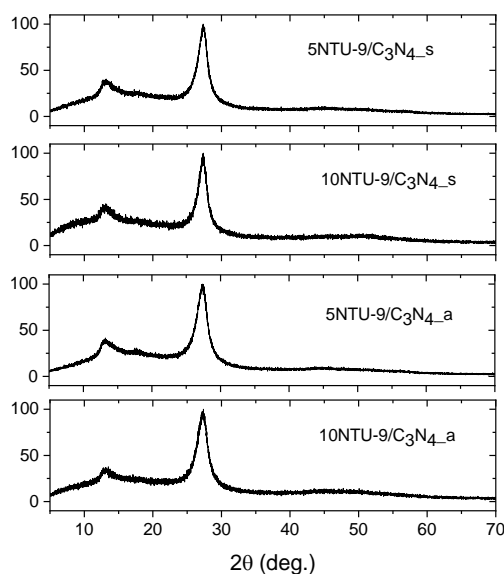

**Figure S2.** Powder XRD patterns for NTU-9/C<sub>3</sub>N<sub>4</sub> hybrid materials.

**Table S1.** Chemical characters of titanium and oxygen identified in Ti 2p and O1s XPS spectra, respectively, recorded for pristine NTU-9 and C<sub>3</sub>N<sub>4</sub> composites and their mixtures prepared by solvothermal method (\_s) and calcination under air (\_a).

| Sample                                   | Ti 2p <sub>3/2</sub> fraction |                |       |          |      |               |       | O 1s fraction             |       |            |       |            |       |      |
|------------------------------------------|-------------------------------|----------------|-------|----------|------|---------------|-------|---------------------------|-------|------------|-------|------------|-------|------|
|                                          | Ti(4+)                        |                |       | Ti(3+)   |      | Satellite (S) |       | A<br>(Ti-O <sub>x</sub> ) |       | B<br>(C=O) |       | C<br>(-OH) |       | A/B  |
|                                          | BE<br>eV                      | FW<br>HM<br>eV | %     | BE<br>eV | %    | BE<br>eV      | %     | BE<br>eV                  | (%)   | BE<br>eV   | %     | BE<br>eV   | %     |      |
| NTU-9                                    | 459.2                         | 1.93           | 95.94 | 0        | 0    | 462.2         | 4.06  | 530.7                     | 15.28 | 532.0      | 74.79 | 533.4      | 9.93  | 0.20 |
| C <sub>3</sub> N <sub>4</sub>            | -                             | -              | -     | -        | -    | -             | -     | 0                         | 0     | 532.0      | 100   | 0          | 0     | 0.00 |
| 5NTU-9/C <sub>3</sub> N <sub>4</sub> _s  | 459.3                         | 1.86           | 92.92 | 0        | 0    | 461.7         | 7.02  | 531.0                     | 22.40 | 532.2      | 63.53 | 533.8      | 14.07 | 0.35 |
| 10NTU-9/C <sub>3</sub> N <sub>4</sub> _s | 459.4                         | 1.80           | 95.83 | 0        | 0    | 462.2         | 4.17  | 531.0                     | 28.61 | 532.3      | 58.49 | 533.6      | 12.90 | 0.49 |
| 15NTU-9/C <sub>3</sub> N <sub>4</sub> _s | 459.3                         | 1.79           | 95.93 | 0        | 0    | 462.3         | 4.08  | 530.9                     | 24.43 | 532.2      | 65.89 | 533.5      | 9.69  | 0.37 |
| 5NTU-9/C <sub>3</sub> N <sub>4</sub> _a  | 458.8                         | 1.33           | 95.58 | 456.9    | 4.42 | 0             | 0     | 530.3                     | 52.68 | 531.8      | 31.72 | 533.1      | 15.60 | 1.66 |
| 10NTU-9/C <sub>3</sub> N <sub>4</sub> _a | 459.0                         | 1.34           | 94.21 | 457.2    | 3.68 | 461.2         | 2.11  | 530.4                     | 67.24 | 531.6      | 21.97 | 532.6      | 10.79 | 3.06 |
| 15NTU-9/C <sub>3</sub> N <sub>4</sub> _a | 459.2                         | 1.36           | 84.40 | 457.3    | 4.05 | 461.2         | 11.55 | 530.6                     | 66.92 | 532.0      | 25.78 | 533.4      | 7.30  | 2.60 |

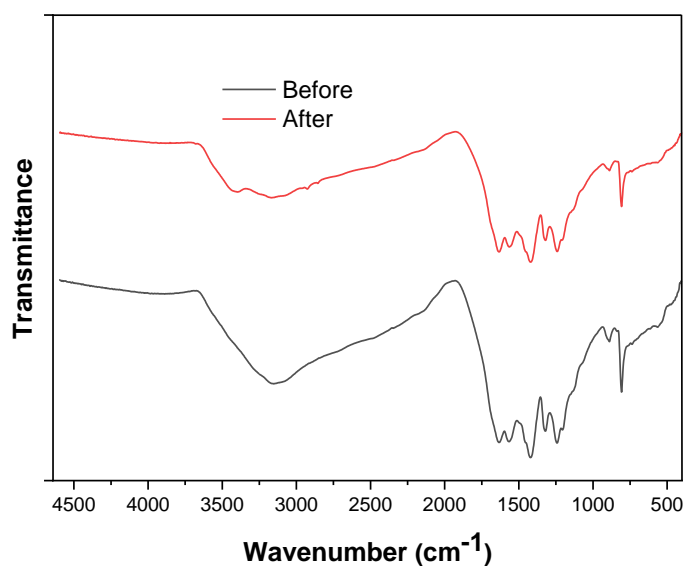

**Figure S3.** FTIR spectra of the most active sample: 15NTU-9/C<sub>3</sub>N<sub>4</sub>\_s before and after photocatalytic process.
